# Supplementary material for: Impact of moderate to severe obstructive sleep apnea on the cognition in idiopathic pulmonary fibrosis
Source: PLoS One. 2019 Feb 1;14(2):e0211455. doi: 10.1371/journal.pone.0211455 (PMC6358087; doi:10.1371/journal.pone.0211455)
Supplement: S1 File — (XLSX) [file pone.0211455.s001.xlsx]

## Sheet: Sheet1
										Gas transfer		Spirometry						Somnography						Anxiety and depresssion questionnaires					Cognition questionnaire (MOCA)											ILD- GAP
		PATIENT		Gender	Age	BMI	Smoker? (0 No, 1 Yes)	Status	Pack-year	DLCO%	DLCO ml/min/mmHG	FVC%	FEV1%	FVC, L	FEV1, L	FEV1/FVC	Comorbidities (number)	AHI	Desat Index	Min. Saturation	Max. Saturation	Mean Saturation	Long-term oxygen therapy? (0 No, 1 Yes)	EPWORTH (sleepiness) max 24p	GAD-7 (anxiety) max 21p	PHQ-9 (depresssion) max 27p	HADS Anxiety max 21p	HADS Depresssion max 21p	Education	Visuospatial	Naming	Attention	Language	Abstraction	Delayed recall	Orientation	Total Points	Antifibrotic therapy? (0 No, 1 Yes)		Male	Age 61-65	Age > 65	FVC 50-75	FVC <50	DLCO 36-55	DLCO <36	Unable to perform DLCO	ILD-GAP points
		IDIOPATHIC PULMONARY FIBROSIS
	1	BE		F	49	19.84	0			22	5.57	47	46	1.54	1.3	83.9	1	4.5	4.8	59	100	98	1	3	7	8	7	7	1	3	3	5	2	2	2	6	24	0		0	0	0	0	2	0	2	0	4
	2	BM		F	64	23	0			34	8.3	50	52	1.55	1.36	87.9	2	23.4	28	79	97	92	0	6	7	5	10	5	0	5	3	6	1	2	3	6	26	0		0	1	0	1	0	0	2	0	4
	3	CF		M	72	24	0			44	11.46	64	73	2.48	2.17	87.7	3	3.8	9.9	83	100	92	1	3	4	7	8	6	1	5	3	6	3	2	2	3	25	0		0	0	2	1	0	1	0	0	4
	4	CI		M	79	31	0			33	8.56	70	71	2.77	2.1	73.6	3	49.6	49.6	54	98	93	1	14	2	7	8	5	1	1	3	4	2	2	2	6	21	1		0	0	2	1	0	0	2	0	5
	5	CV		F	60	32	0			58	12.91	53	56	1.39	1.25	88.2	2	61.5	56.4	55	95	88	0	4	9	7	10	5	1	3	3	2	2	2	2	3	18	1		0	0	0	1	0	0	0	0	1
	6	CA		M	74	40	1	ex	40	54	13.14	72	81	2.63	2.24	85.2	3	11	25.1	51	96	90	0	5	3	6	2	9	1	2	3	6	2	2	1	6	23	1		0	0	2	1	0	1	0	0	4
	7	CS		F	79	26.1	0			29	5.97	70	71	1.7	1.43	84.2	4	4.1	12.4	55	100	97	1	9	16	21	9	13	1	2	3	3	0	0	0	6	15	0		0	0	2	1	0	0	2	0	5
	8	DE		M	71	26	1	ex	37.5	71	19.78	73	76	3.06	2.44	79.6	3	7.3	13.4	80	98	94	1	4	3	7	7	8	1	4	3	5	2	2	1	6	24	1		0	0	2	1	0	0	0	0	3
	9	DF		M	70	28	1	ex	20	63	15.59	84	92	3.09	2.6	85	2	27.8	13.9	86	99	96	1	7	3	2	9	2	1	4	2	4	1	1	2	6	21	0		0	0	2	0	0	0	0	0	2
	10	DT		M	69	30	1	ex	15	34	7.54	69	69	2.23	1.75	78.4	2	19.8	25.3	76	97	91	1	7	1	6	10	4	1	4	3	6	3	2	0	6	25	1		0	0	2	1	0	0	2	0	5
	11	DA		F	65	32	0			52	10.05	82	87	1.75	1.54	78.8	2	26.4	19.5	59	98	93	1	8	2	7	7	9	1	4	2	4	1	1	0	6	19	1		0	1	0	0	0	1	0	0	2
	12	FF		F	55	26	0			31	7.45	58	56	1.76	1.43	81.3	1	26.7	22.3	83	97	94	0	6	3	3	9	8	1	3	3	6	1	2	0	6	22	1		0	0	0	1	0	0	2	0	3
	13	HE		F	66	32	0			54	11.18	98	103	2.32	2.04	88.1	2	9.3	16.2	83	97	93	0	3	3	4	5	10	1	5	3	6	2	1	3	6	27	1		0	0	2	0	0	1	0	0	3
	14	LA		F	59	32	0			59	12.46	72	71	1.79	1.49	83.3	2	6.3	10.3	83	98	95	0	3	2	3	6	8	1	5	3	6	2	2	3	6	28	1		0	0	0	1	0	0	0	0	1
	15	MS		M	66	32	1	ex	20	64	16.72	92	100	3.57	3.03	83.9	2	50.1	16.6	78	99	95	0	5	1	3	14	9	1	3	2	3	0	0	0	6	15	1		0	0	2	0	0	0	0	0	2
	16	NA		F	71	25	0			36	7.36	76	73	1.78	1.47	82.7	1	18.1	20.3	59	96	93	1	4	11	8	6	12	1	0	3	2	1	2	0	6	15	1		0	0	2	0	0	1	0	0	3
	17	OA		M	76	22	1	ex	15	41	9.41	77	89	2.6	2.27	87.6	1	32.4	21.2	56	97	94	0	3	4	3	9	4	1	5	3	6	3	2	3	6	29	1		0	0	2	0	0	1	0	0	3
	18	SL		M	66	25	1	ex	40	23	5.87	62	72	2.32	2.11	92.1	1	16.2	20.8	50	95	84	1	7	5	8	7	10	1	4	3	6	2	2	1	6	25	0		0	0	2	1	0	0	2	0	5
	19	SG		M	87	26	1	ex	30	32	7.62	55	66	1.96	1.74	89.6	2	10.7	5.4	58	97	93	1	5	7	5	13	11	1	4	3	6	2	2	2	6	26	0		0	0	2	1	0	0	2	0	5
	20	SP		M	73	25	1	ex	31.5	36	8.98	50	55	1.85	1.55	85.3	3	9.2	1.3	60	100	98	1	3	12	11	9	7	0	4	3	6	3	2	2	6	26	0		0	0	2	1	0	1	0	0	4
	21	SI		M	58	29	1	ex	50	55	16.38	116	101	5.12	3.55	69.2	1	19.3	17.1	85	98	94	0	2	2	2	3	1	0	5	3	5	3	2	1	6	25	1		0	0	0	0	0	1	0	0	1
	22	VO		M	67	26	1	active	44	45	11.34	71	82	2.64	2.36	89	1	3.7	7.8	81	100	96	0	3	2	4	12	7	1	3	3	5	2	2	2	6	24	1		0	0	2	1	0	1	0	0	4
	23	HE		F	59	24.84	1	ex	20	43.5	9.87	78.3	83.7	2.15	1.94	90.2	3	9	21.7	57	100	93	1	7	2	9	2	14	1	5	3	4	3	2	5	6	29	0		0	0	0	0	0	1	0	0	1
[truncated: 33 more columns]

## Sheet: Sheet2
		PATIENT	AHI	Apnea Index	Hypopnea Index	No of Apnea	Of them Central	Mean Desat of Apnea	No of Hypopnea	Total Apnea / Hypopnea time	Apnea / hypopnea time per hour	Longest Apnea	Longest Hypopnea	CSB time per hour	Snoring Index	Snoring Index SI Obstructive	Total Snoring Time	No of desat	No of desat <90%	Total time	Time per hour	Lowest Desat	Longest Desat	Mean Duration	Mean Desat	Mean Sat	Max Sat	Min Sat	t90	Min Puls	Max Puls	Mean Pulse	Pulse variances	Puls variances index	Desaturation Index
		IDIOPATHIC PULMONARY FIBROSIS
	1	BE	4.5	3	1.5	24	0	15	12	9:23	1:10	33	26	0	0	0	0	38	3	17:12	2:11	89	1:19	27	93	98	100	59	0	25	189	63+15	152	19.8	4.8
	2	BM	23.4	1.4	22	11	0	14	176	46:41	5:50	23	32	01:09:00	0.5	0.1	1	224	125	1:48:21	13:34	79	1:50	29	89	92	97	79	7	48	87	58+9	97	12.1	28
	3	CF	3.8	1	2.8	8	0	13	22	6:53	0:52	24	26	0	0	0	0	79	39	38:35	4:50	84	1:56	29	89	92	100	83	6	26	148	59+8	55	6.9	9.9
	4	CI	49.6	15.8	33.8	125	6	17	267	1:57:48	14:56	47	57	0	0	0	0	392	110	2:50:35	21:35	54	1:44	26	90	93	98	54	6	19	135	58+4	12	1.5	49.6
	5	CV	61.5	21	40.5	151	2	13	291	1:45:45	14:43	46	36	01:45:00	0	0	0	404	398	2:11:51	18:25	60	1:33	19	85	88	95	55	57	29	157	64+10	61	8.6	56.4
	6	CA	11	0.9	10.1	7	0	25	81	21:31	2:41	65	23	11	0	0	0	184	125	1:15:48	10:20	54	1:35	24	87	90	96	51	23	6	169	49+28	92	30.3	25.1
	7	CS	4	0	4	0	0	0	32	10:09	1:16	0	46	0	2.9	0	157	95	40	34:22	4:30	70	1:25	21	89	97	100	55	7	28	134	62+8	48	6.6	12.4
	8	DE	7.3	2.3	5	18	1	14	40	13:23	1:41	22	20	0	0	0	0	107	3	49:33	6:12	85	1:50	27	91	94	98	80	0	48	147	55+8	22	2.8	13.4
	9	DF	27.8	17.3	10.5	126	2	17	77	53:41	7:21	57	27	0	0	0	0	111	3	47:58	6:0	86	1:09	25	93	96	99	86	0	25	101	65+12	335	41.9	13.9
	10	DT	19.8	1.5	18.3	12	1	13	145	35:10	4:26	17	38	0	0.1	0	0	202	101	1:33:18	11:41	76	1:34	27	89	91	97	76	11	39	89	50+8	215	27.1	25.3
	11	DA	26.4	8	18.4	48	2	15	111	35:36	5:54	56	40	0	0	0	0	156	17	1:00:58	7:38	81	1:10	23	91	93	98	59	0	46	70	56+8	46	5.8	19.5
	12	FF	26.7	9.3	17.4	74	0	16	139	55:26	6:56	81	36	48	0	0	0	178	33	1:08:58	8:38	85	1:09	23	91	94	97	83	1	29	109	63+17	260	32.9	22.3
	13	HE	9.3	0.4	8.9	3	0	12	71	17:07	2:08	15	28	56	0.6	0	2	129	31	1:00:47	7:37	83	1:22	28	90	93	97	83	1	48	89	62+8	87	10.9	16.2
	14	LA	6.3	0.4	5.9	3	1	10	47	11:01	1:23	11	25	18	0.6	0	2	82	19	39:28	4:57	83	2:28	28	91	95	98	83	0	37	200	81+19	69	9.2	10.3
	15	MS	50.1	36.5	13.6	274	2	20	102	1:56:02	15:27	72	31	12	1.3	0.1	3	130	8	52:59	6:45	85	1:16	24	92	95	99	78	1	65	128	79+16	134	17.1	16.6
	16	NA	18.1	5.6	12.5	44	0	14	99	34:43	4:23	30	32	10	0.4	0	1	162	59	1:19:57	10:01	74	1:56	29	90	93	96	59	3	51	92	64+10	56	7	20.3
	17	OA	32.4	27.2	5.2	189	0	18	36	1:05:41	9:27	48	27	0	0	0	0	160	59	55:56	7:24	83	1:19	20	90	94	97	56	2	19	213	49+21	229	38.3	21.2
	18	SL	16.2	10.3	5.9	66	0	17	38	27:26	4:16	77	22	0	0	0	0	163	155	1:05:25	8:20	67	1:52	24	80	84	95	50	76	33	122	88+9	36	4.7	20.8
	19	SG	10.7	6.7	4	28	0	14	17	9:55	2:21	24	26	0	0	0	0	26	10	13:43	2:52	76	1:42	31	89	93	97	58	1	67	96	75+8	22	4.6	5.4
	20	SP	9.2	1.6	7.6	10	0	16	47	18:26	2:59	31	40	0	0	0	0	8	0	3:57	0:38	91	0:53	29	96	98	100	60	0	33	100	79+12	101	17	1.3
	21	SI	19.3	11.8	7.5	88	11	17	56	40:47	5:28	33	28	38	0.1	0	0	137	19	1:01:39	7:43	85	1:05	27	91	94	98	85	0	56	181	68+13	233	29.2	17.1
	22	VO	3.7	0.3	3.4	2	0	19	27	6:57	0:52	27	25	12	0.5	0	1	62	8	32:33	4:05	81	1:29	31	92	96	100	81	0	24	157	64+15	274	35.2	7.8
	23	HE	9	0	9	0	0	0	72	18:17	2:17	0	36	23	3.4	0	351	173	52	1:18:54	9:54	84	1:06	27	91	93	100	57	3	45	173	72+16	95	12	21.7
